# Supplementary material for: Short polyethylene glycol chains densely bound to soft nanotube channels for inhibition of protein aggregation
Source: Royal Society of Chemistry journal article supplement (doi:10.1039/c6ra06793j), 2016-01-01
Supplement: c6ra06793j1.pdf [file c6ra06793j1.pdf]

## **Electronic Supplemental Information (ESI)**

### **Title**

Short Polyethylene Glycol Chains Densely Bound to Soft Nanotube Channels for Inhibition of Protein Aggregation

### **Authors**

N. Kameta,\* T. Matsuzawa, K. Yaoi and M. Masuda

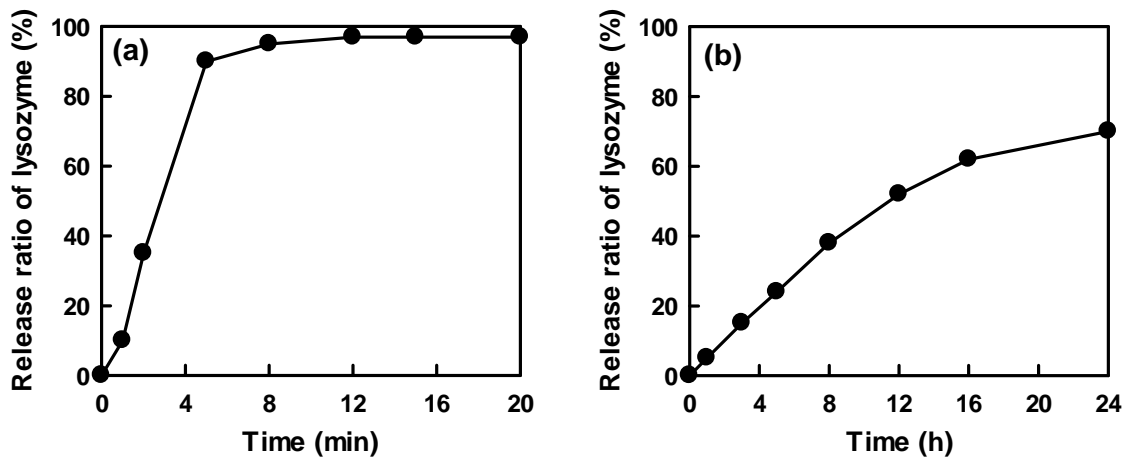

**Fig. S1** (a) Release of the encapsulated lysozyme (3.0 mg/ml) in the PEG<sub>8</sub>-NT channel to the bulk solution by cooling to 25 °C. The sample solution was prepared by heating at 90 °C of the mixing dispersion of the PEG<sub>8</sub>-NT (25 mg/ml) and lysozyme (3.0 mg/ml). (b) Release of the encapsulated lysozyme (3.0 mg/ml) in the PEG<sub>8</sub>-NT channel to the bulk solution by standing at 25 °C. The sample solution was prepared as follows: The lysozyme solution (3.0–9.0 mg/ml) was added into the lyophilized PEG<sub>8</sub>-NT (25 mg/ml). The resultant mixture was filtered by the polycarbonate membrane with 200 nm pore size. The residual PEG<sub>8</sub>-NT was washed several times with PBS buffer to remove lysozyme existing outside of the PEG<sub>8</sub>-NT.

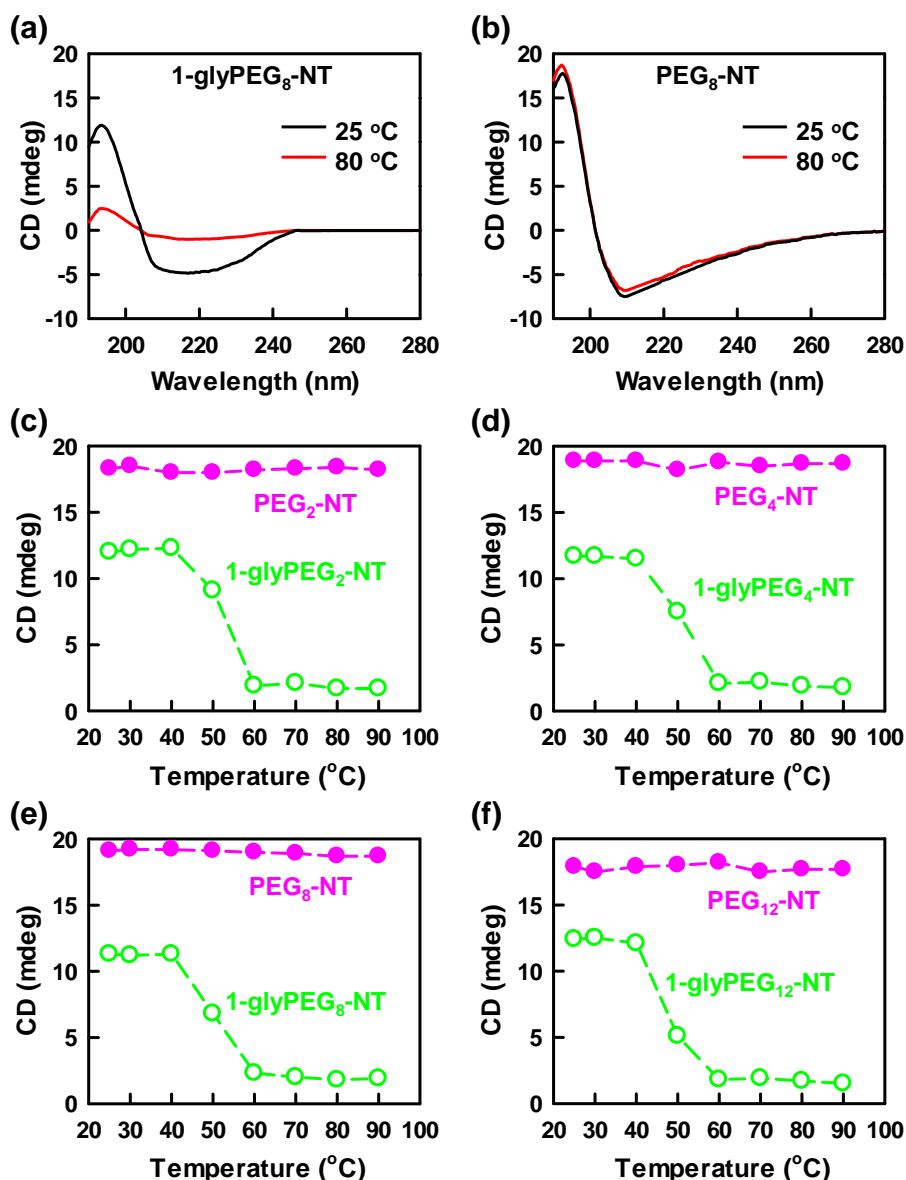

**Fig. S2** (a, b) CD spectra of the 1-glyPEG<sub>8</sub>-NT and the PEG<sub>8</sub>-NT dispersed in water at 25 °C and 80 °C. The wavelength region of the Cotton bands corresponds to the absorption band of the conjugated amide linkages in co-assembly of **1** with the chiral source (<sub>D</sub>-glucose moiety), achiral glyPEG<sub>8</sub> and **2** with the chiral source (<sub>D</sub>-glucose moiety). The decrease of the CD intensity of the 1-glyPEG<sub>8</sub>-NT at 80 °C means that the chiral molecular packing is destructed by the gel-to-liquid crystalline phase transition of the nanotube monolayer membrane. (c, d, e, f) Temperature dependence of the CD intensities at 195 nm for the 1-glyPEG<sub>*n*</sub>-NTs and the PEG<sub>*n*</sub>-NTs dispersed in water. The gel-to-liquid crystalline phase transition temperatures ( $T_{g-l}$ ) of the 1-glyPEG<sub>*n*</sub>-NTs were estimated to be about 50 °C. All PEG<sub>*n*</sub>-NTs showing no decrease of the CD intensities have higher thermal stabilities.

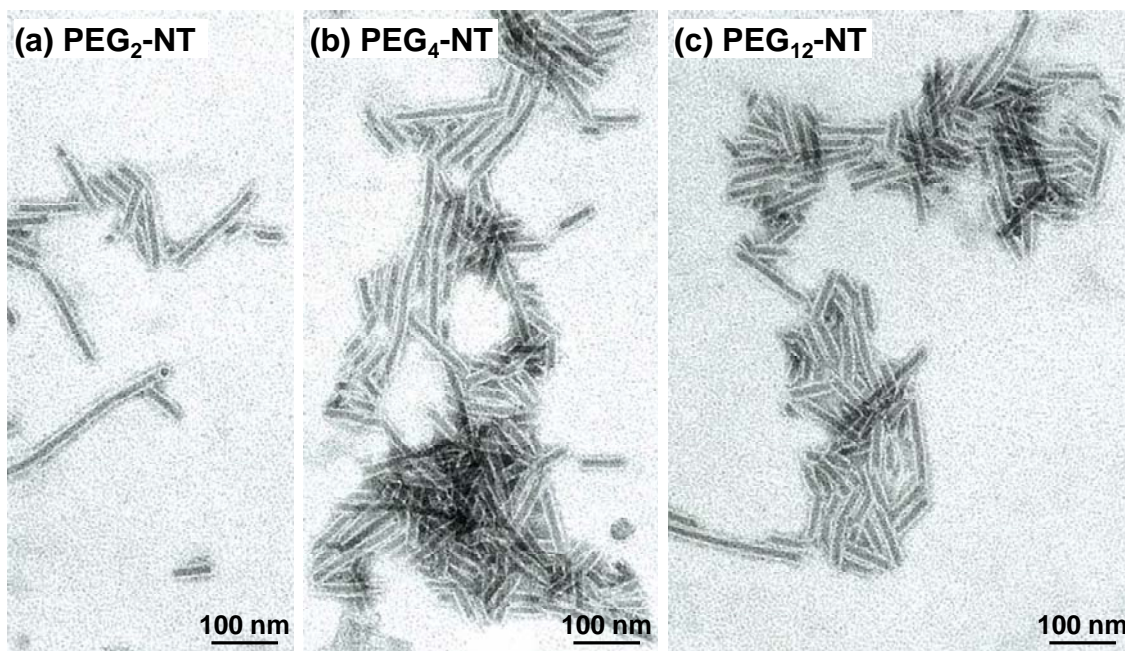

**Fig. S3** TEM images of the PEG<sub>n</sub>-NTs after sonication. The nanochannels of the nanotubes were visualized with 2wt% phosphotungstate as a negative staining reagent.

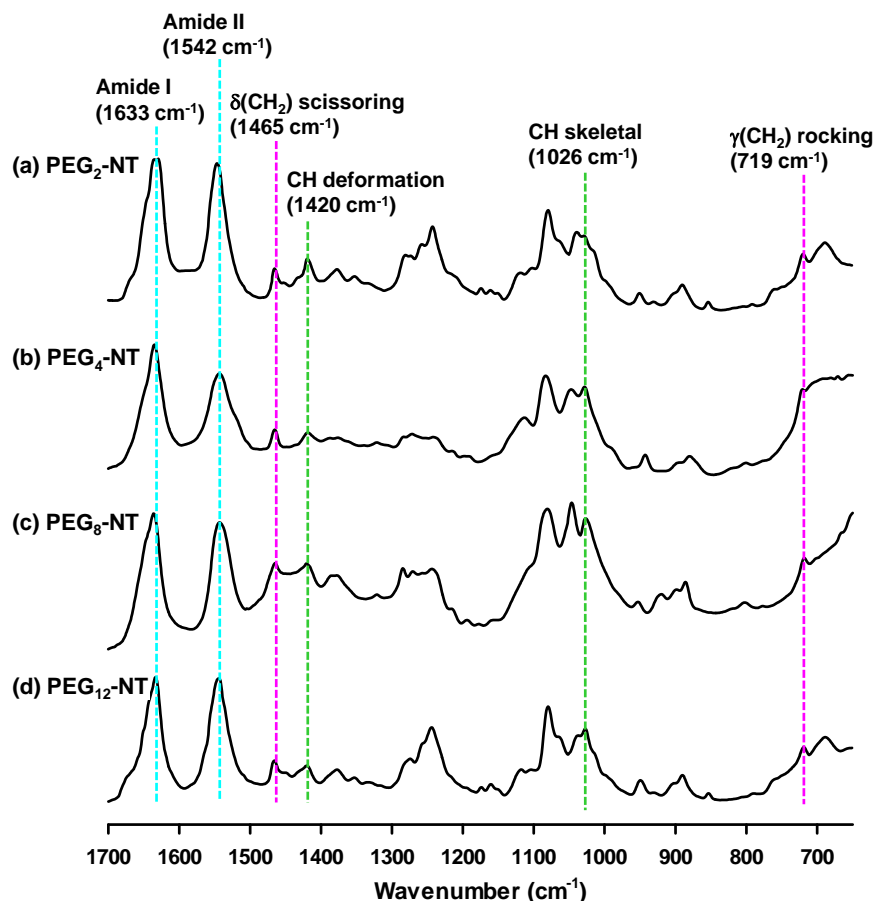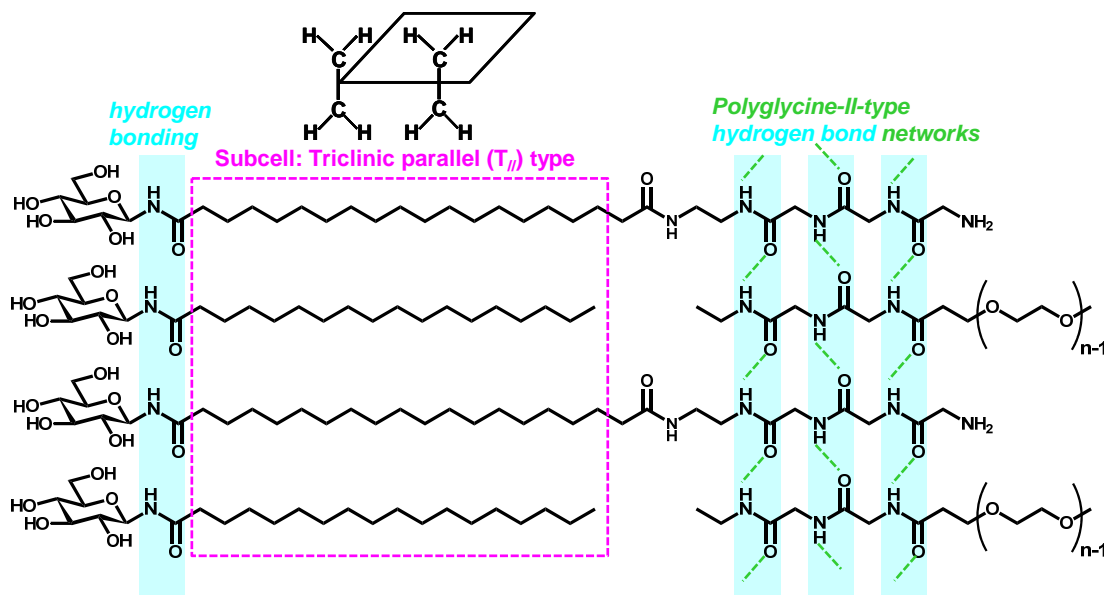

**Fig. S4** IR spectra for the amide-I, amide-II, CH<sub>2</sub> scissoring, CH<sub>2</sub> rocking, CH deformation and CH skeletal bands of the PEG<sub>n</sub>-NTs. The appearance of the CH<sub>2</sub> deformation and CH<sub>2</sub> skeletal shows that **1** and glyPEG<sub>n</sub> forms a polyglycine-II-type hydrogen bond network. The single sharp peak of the CH<sub>2</sub> scissoring and CH<sub>2</sub> rocking indicates that the lateral chain packing (subcell structure) of the oligomethylene spacer of **1** and **2** has a triclinic parallel (T<sub>//</sub>) structure.

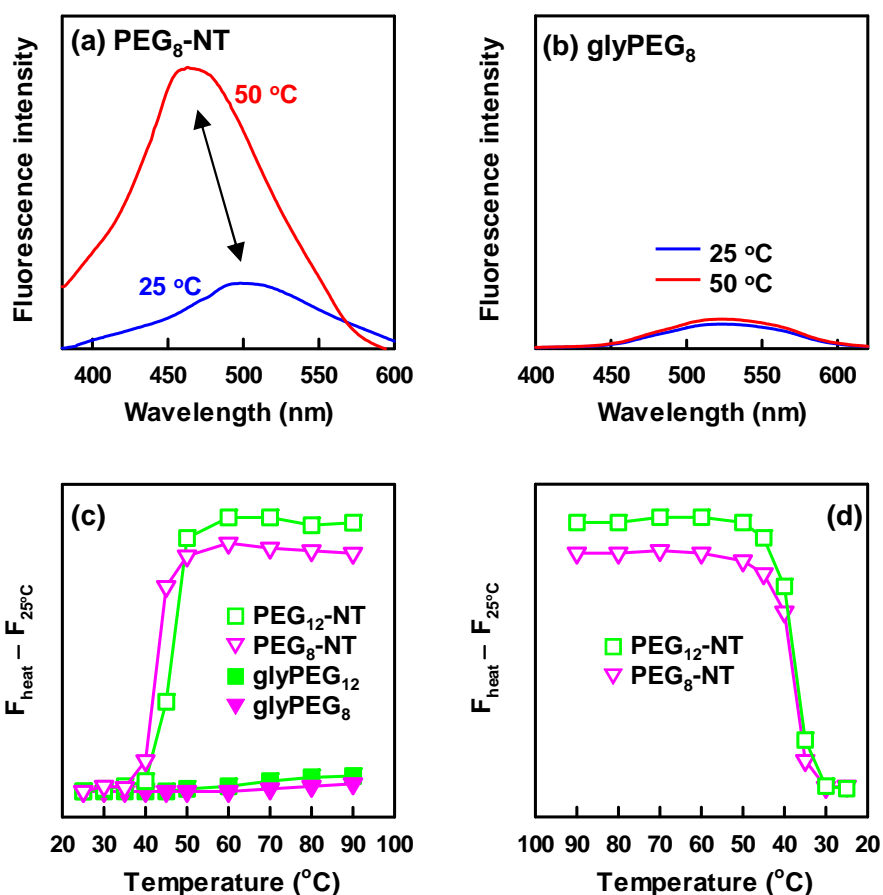

**Fig. S5** (a, b) Fluorescence spectra of the encapsulated 1,8-ANS in the PEG<sub>8</sub>-NT channel and the free 1,8-ANS in the presence of glyPEG<sub>8</sub> unit in bulk solutions at 25 °C and 50 °C. (c) Relationship between the variation of the fluorescence intensity and the elevating temperatures. (d) Relationship between the variation of the fluorescence intensity and the cooling temperatures.

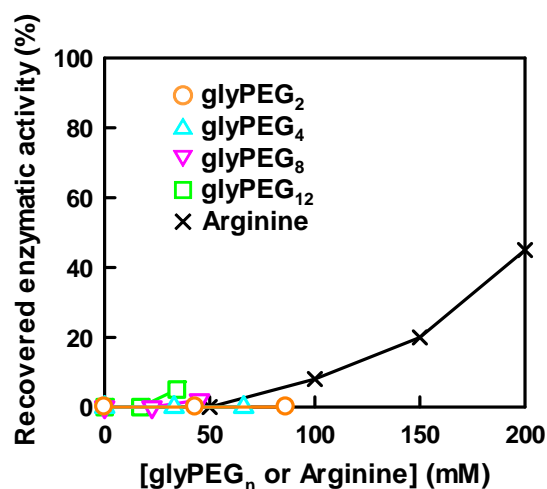

**Fig. S6** Enzymatic activities of lysozyme (0.2 mM) with different concentrations of the glyPEG<sub>n</sub> unit or arginine after heating at 90 °C for 30 min.
